# Supplementary material for: Optical properties of free-standing gelatin–Si nanoparticle composite films and gelatin–Si–Au nanoparticle composite films
Source: Royal Society of Chemistry journal article supplement (doi:10.1039/c3cp53618a), 2013-01-01
Supplement: c3cp53618a.pdf [file c3cp53618a.pdf]

## Supporting Information

### Optical properties of free-standing gelatin/Si nanoparticles composite films and gelatin/Si-Au nanoparticles composite films

Li Shi,<sup>a</sup> Ting Yu,<sup>a</sup> Luwei Sun,<sup>a</sup> Xiaodong Pi,<sup>a</sup> Xinsheng Peng<sup>a, b\*</sup>

<sup>a</sup>State Key Laboratory of Silicon Materials, Department of Materials Science and Engineering, <sup>b</sup>Cyrus Tang Center for Sensor Materials and Applications, Zhejiang University, Hangzhou, 310027, China

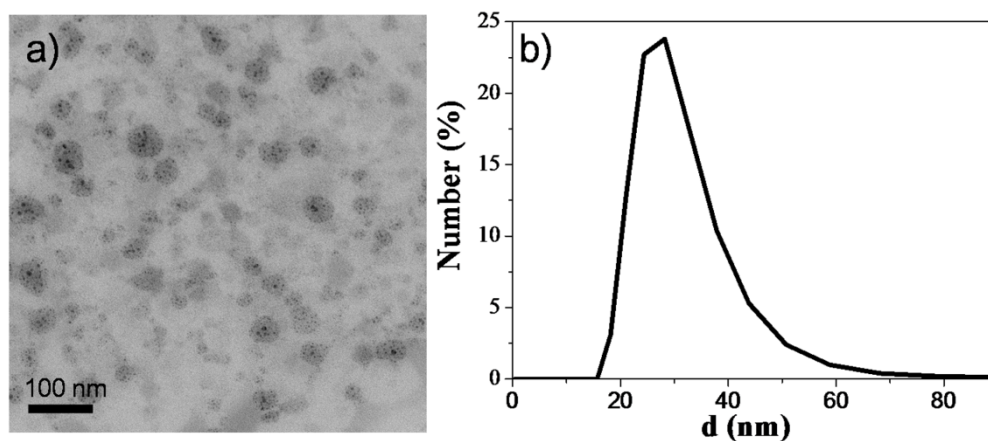

**Figure S1** (a) TEM image of water-dispersible Si NPs assemblies; (b) the corresponding DLS histogram of these Si NPs assemblies.

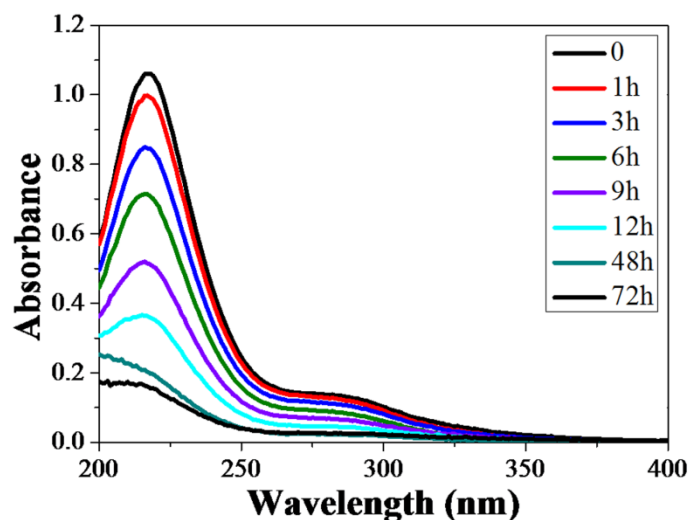

**Figure S2** The UV-vis absorption spectra of the HAuCl<sub>4</sub> aqueous solution in the presence of gelatin/Si NPs composite film at pH 3 for different time.

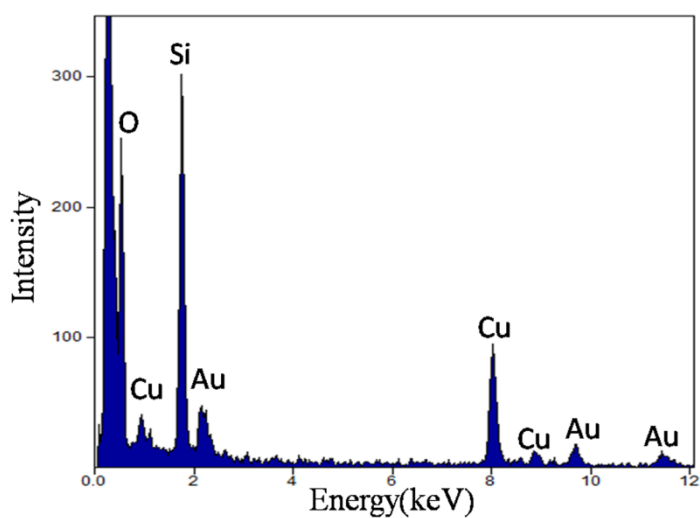

**Figure S3** The energy dispersive X-ray analysis spectrum of the gelatin/Si -Au NPs composite film prepared for 1 hour.

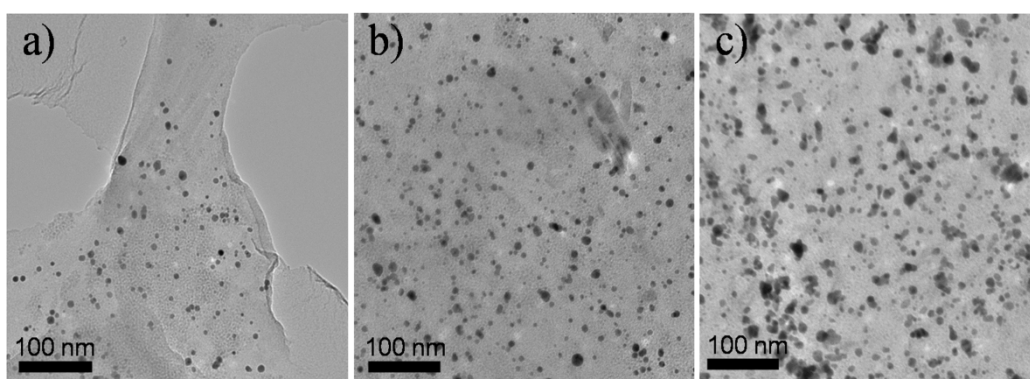

**Figure S4** TEM images of the gelatin/Si -Au NPs composite films prepared after immersing for (a) 3 hours; (b) 6 hours and (c) 72 hours, respectively.

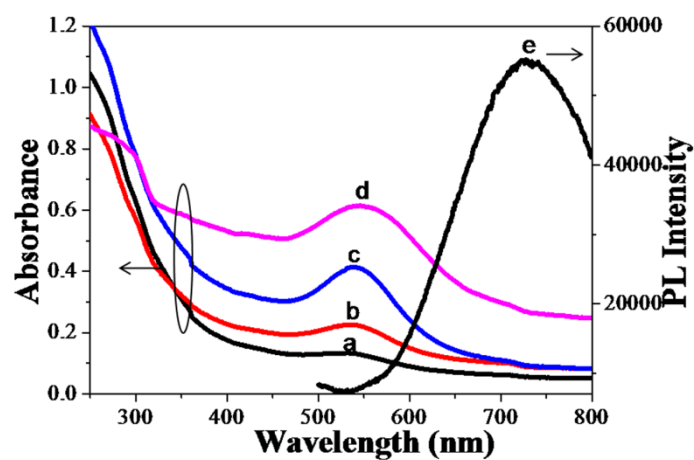

**Figure S5** The Uv-vis absorption spectra of gelatin/Si-Au NPs composite films prepared for (a) 1 hour, (b) 3 hours, (c) 6 hours, and (d) 72 hours; (e) PL spectra of gelatin/Si NPs composite film. The excited wavelength is 325 nm.
